# Supplementary material for: Highly stereoselective synthesis of (Z,E)-1-halo-1,3-dienol esters via rearrangement of Fischer chromium chloro-carbenes using microwave irradiation
Source: Royal Society of Chemistry journal article supplement (doi:10.1039/b903244b), 2009-01-01

## *Supporting Information*

### **Highly Stereoselective Synthesis of (Z,E)-1-halo-1,3-dienol Esters via Rearrangement of Fischer Chromium Chloro-carbenes using Microwave Irradiation <sup>†‡</sup>**

**Dhurke Kashinath,<sup>a</sup> Charles Mioskowski,<sup>a#</sup> J. R. Falck,<sup>b</sup> Mohan Goli,<sup>b</sup> Stéphane Meunier,<sup>a\*</sup> Rachid Baati,<sup>a\*</sup> and Alain Wagner<sup>a</sup>**

*<sup>a</sup>Laboratoire de Chimie des Systèmes Fonctionnels, UMR 7199, Faculté de Pharmacie, Université de Strasbourg, 74 Route du Rhin, B. P. 60024, 67401 Illkirch, France.*

*Tel: (+33)3-9024-4301; Tel: (+33)3-9024-4295; Fax: (+33)3-9024-4306;*

*E-mail: [baati@bioorga.u-strasbg.fr](mailto:baati@bioorga.u-strasbg.fr); [meunier@bioorga.u-strasbg.fr](mailto:meunier@bioorga.u-strasbg.fr)*

*<sup>b</sup>Department of Biochemistry, University of Texas Southwestern Medical Center, 5323 Harry Hines Blvd., Dallas, TX 75390-9038, USA.*

#### **CONTENTS**

|                                                                                                         |                |
|---------------------------------------------------------------------------------------------------------|----------------|
| <b>1. General procedures for the preparation of 1-halo-1,3-dienol esters under microwave conditions</b> | <b>page 2</b>  |
| <b>2. Data of original compounds</b>                                                                    | <b>page 8</b>  |
| <b>3. X-ray structure plots generated by ORTEP software</b>                                             | <b>page 22</b> |

## 1. General procedure for the preparation of 1-halo-1,3-dienol esters under microwave conditions

To a solution of allylic 1,1,1-trichloromethylcarbinol ester (1 equiv) in dry THF was added  $\text{CrCl}_2$  (3.5 equiv) and the mixture was degassed with argon for 10 min and allowed to be irradiated under microwaves at 70 °C for 25 min. After completion of the reaction (TLC), the reaction mixture was cooled to RT, diluted with water and extracted with diethyl ether. The organic layers were washed with water, brine and dried over  $\text{Na}_2\text{SO}_4$ . Evaporation of the solvent under reduced pressure gave the crude product which was purified by silica gel column chromatography. Elution of the column with diethyl ether/*n*-pentane gave the desired (*Z,E*)-1-halo-1,3-dienol esters.

CAUTION: 1-halo-1,3-dienol esters are highly reactive molecules that may be harmful (characteristic pungent smell) upon prolonged exposure during manipulations and purification steps. It is suggested to use proper precautions (well ventilated fume hood) while working with compounds.

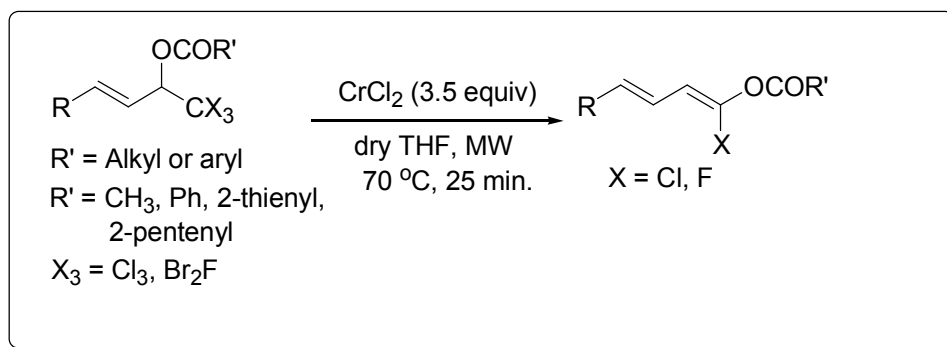

### (*1Z,3E*)-1-chloro-4-phenylbuta-1,3-dienyl acetate (2)

Colorless low melting solid

Yield: 84% (conventional heating)

92% (microwave conditions)

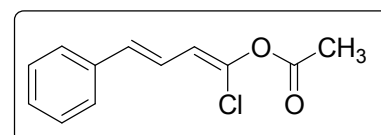

$^1\text{H-NMR}$  (300 MHz,  $\text{CDCl}_3$ )  $\delta$  2.24 (s, 3H), 6.20 (d,  $J = 10.3$

Hz, 1H), 6.65 (d,  $J = 15.9$  Hz, 1H), 6.88 (dd,  $J_1 = 10.2$  Hz,  $J_2 = 5.2$  Hz, 1H), 7.31 (d,  $J = 8.1$  Hz, 1H), 7.37-7.35 (m, 2H), 7.44 (d,  $J = 7.1$  Hz, 2H).

$^{13}\text{C-NMR}$  (75 MHz,  $\text{CDCl}_3$ )  $\delta$  20.96, 119.20, 122.36, 127.05, 128.62, 129.10, 135.53, 135.62, 137.09, 168.15.

FTIR (neat)  $\nu_{\max}$  2923, 2853, 1783, 1638, 1368, 1176, 1079, 962, 747, 690  $\text{cm}^{-1}$

GCMS (EI): 222.1 ( $\text{M}^+$ ).

**(1Z,3E)-1-chloro-4-(4-chlorophenyl) buta-1,3-dienyl acetate (4)**

White colored low melting solid

Yield: 24% (conventional heating)

74% (microwave conditions)

$^1\text{H-NMR}$  (300 MHz,  $\text{CDCl}_3$ )  $\delta$  2.23 (s, 3H), 6.17 (d,  $J =$

10.2 Hz, 1H), 6.58 (d,  $J = 15.9$  Hz, 1H), 6.83 (dd,  $J_1 = 10.6$  Hz,  $J_2 = 5.2$  Hz, 1H), 7.30 (d,  $J = 8.7$  Hz, 2H), 7.36 (d,  $J = 8.4$  Hz, 2H).

$^{13}\text{C-NMR}$  (75 MHz,  $\text{CDCl}_3$ )  $\delta$  20.96, 118.96, 122.95, 128.19, 129.29, 134.07, 134.21, 135.58, 136.09, 168.07.

FTIR (neat)  $\nu_{\max}$  2922, 2852, 1783, 1638, 1490, 1369, 1175, 1077, 963, 805, 637, 630  $\text{cm}^{-1}$

GCMS (CI): 257.1 ( $\text{M}+1$ )

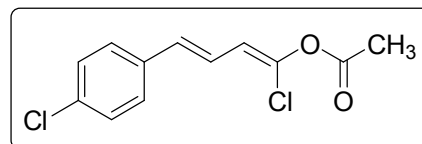

**(Z)-1-chlorobuta-1,3-dienyl acetate (6)**

Colorless liquid

Yield: (>90% conversion from crude  $^1\text{H-NMR}$  spectrum)

$^1\text{H-NMR}$  (300 MHz,  $\text{CDCl}_3$ )  $\delta$  3.21 (s, 3H), 5.31 (ddd,  $J_1 = 18.0$  Hz,  $J_2 =$

10.9 Hz,  $J_3 = 3.2$  Hz, 2H), 6.03 (d,  $J = 10.4$ , 1H), 6.47 (dt,  $J_1 = 17.1$  Hz,  $J_2 = 10.4$  Hz, 1H).

$^{13}\text{C-NMR}$  (75 MHz,  $\text{CDCl}_3$ )  $\delta$  20.64, 119.07, 120.65, 130.39, 135.73, 167.73.

FTIR (neat)  $\nu_{\max}$  2924, 2853, 1787, 1732, 1217, 1185, 1101, 669  $\text{cm}^{-1}$

GCMS (CI): 147.0 ( $\text{M}+1$ )

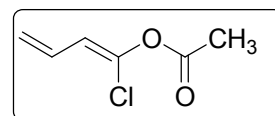

**(Z)-1-chlorobuta-1,3-dienyl benzoate (8)**

Colorless liquid

Yield: 68%

$^1\text{H-NMR}$  (300 MHz,  $\text{CDCl}_3$ )  $\delta$  5.36 (ddd,  $J_1 = 16.8$ ,  $J_2 = 10.2$ ,  $J_3 =$

8.1 Hz, 2H), 6.18 (d,  $J = 10.2$ , 1H), 6.56 (dt,  $J_1 = 17.1$ ,  $J_2 = 10.5$

Hz, 1H), 7.53-7.48 (m, 2H), 7.68-7.63 (m, 1H), 8.05 (d,  $J = 8.1$  Hz, 2H).

$^{13}\text{C-NMR}$  (75 MHz,  $\text{CDCl}_3$ )  $\delta$  110.00, 119.62, 120.92, 128.53, 129.14, 130.77, 134.66, 136.33, 163.90.

FTIR (neat)  $\nu_{\max}$  3062, 2926, 1753, 1695, 1451, 1259, 1091, 1037, 1012, 870, 735, 703, 649  $\text{cm}^{-1}$

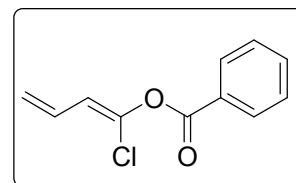

GCMS (CI): 209.1 (M+1)

***(Z)*-1-chlorobuta-1,3-dienyl thiophene-2-carboxylate (10)**

Colorless liquid

Yield: 81%

$^1\text{H-NMR}$  (300 MHz,  $\text{CDCl}_3$ )  $\delta$  5.31 (d,  $J = 10.2$  Hz, 1H), 5.42-5.30 (m, 1H), 6.18 (d,  $J = 10.2$  Hz, 1H), 6.53 (dt,  $J_1 = 17.1$  Hz,  $J_2 = 10.5$

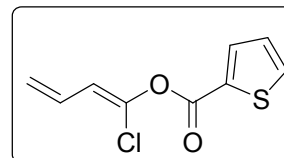

Hz, 1H), 7.18 (td,  $J_1 = 4.2$  Hz,  $J_2 = 0.1$  Hz, 1H), 7.77 (t,  $J = 2.9$  Hz, 1H), 7.95 (t,  $J = 2.6$ , 1H).

$^{13}\text{C-NMR}$  (75 MHz,  $\text{CDCl}_3$ )  $\delta$  119.58, 119.84, 120.87, 121.13, 128.63, 130.59, 131.50, 135.00, 135.18, 135.88, 136.00, 136.18, 159.22.

FTIR (neat)  $\nu_{\text{max}}$  2922, 2851, 1781, 1737, 1661, 1519, 1411, 1246, 1077, 1043, 997, 858, 720  $\text{cm}^{-1}$

GCMS (CI): 215.1 (M+1)

***(Z)*-1-chlorobuta-1,3-dienyl pent-4-enoate (12)**

Colorless liquid, 85%

$^1\text{H-NMR}$  (300 MHz,  $\text{CDCl}_3$ )  $\delta$  2.55-2.41 (m, 2H), 2.58 (t,  $J_1 = 6.8$  Hz,  $J_2 = 1.5$  Hz, 2H), 5.15-5.05 (m, 2H), 5.80-5.78 (m, 2H),

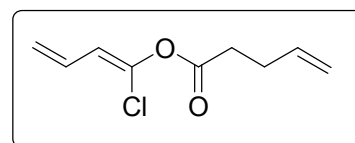

5.85 (dddd,  $J_1 = 17.3$  Hz,  $J_2 = 10.1$  Hz,  $J_3 = 5.0$  Hz, 1H), 6.02 (dd,  $J_1 = 10.6$  Hz,  $J_2 = 2.4$  Hz, 1H), 6.47 (dtd,  $J_1 = 17.0$  Hz,  $J_2 = 10.5$  Hz,  $J_3 = 2.4$  Hz, 1H).

$^{13}\text{C-NMR}$  (75 MHz,  $\text{CDCl}_3$ ) 28.84, 33.49, 116.62, 119.21, 120.75, 130.61, 135.96, 136.10, 170.11.

FTIR (neat)  $\nu_{\text{max}}$  2924, 2853, 1777, 1645, 1417, 1256, 1080, 913, 681  $\text{cm}^{-1}$

GCMS (CI): 187.1 (M+1)

***(Z)*-1-chloro-4-methylpenta-1,3-dienyl acetate (14)**

Colorless liquid

Yield: (>90% conversion from crude  $^1\text{H-NMR}$  spectrum)

$^1\text{H-NMR}$  (300 MHz,  $\text{CDCl}_3$ )  $\delta$  1.74 (s, 3H), 1.85 (s, 3H), 2.21 (s, 3H), 5.2 (dt,  $J_1 = 10.9$  Hz,  $J_2 = 2.1$  Hz, 1H), 6.18 (d,  $J = 10.8$  Hz, 1H).

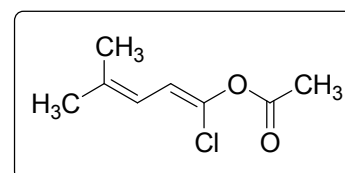

FTIR (neat)  $\nu_{\text{max}}$  2979, 2931, 1697, 1655, 1416, 1286, 1132, 1081, 978, 669  $\text{cm}^{-1}$

GCMS (CI): 175.1 (M+1)

**(Z)-1-chloro-4-methylpenta-1,3-dienyl benzoate (16)**

Colorless liquid 77%

$^1\text{H-NMR}$  (300 MHz,  $\text{CDCl}_3$ )  $\delta$  1.76 (s, 3H), 1.88 (s, 3H), 6.01 (dt,  $J_1 = 11.0$  Hz,  $J_2 = 2.1$  Hz, 1H), 6.32 (d,  $J = 10.8$  Hz, 1H), 7.45 (d,  $J_1 = 8.4$  Hz,  $J_2 = 7.2$  Hz, 2H), 7.75 (t,  $J = 7.2$  Hz, 1H), 8.11 (d,  $J = 8.4$  Hz, 2H).

$^{13}\text{C-NMR}$  (75 MHz,  $\text{CDCl}_3$ )  $\delta$  19.35, 26.72, 115.69, 118.62, 128.78, 129.06, 130.73, 133.77, 134.46, 140.19, 164.38.

FTIR (neat)  $\nu_{\text{max}}$  2981, 2933, 1789, 1756, 1697, 1287, 1242, 1082, 709  $\text{cm}^{-1}$

GCMS (CI): 237.1 (M+1)

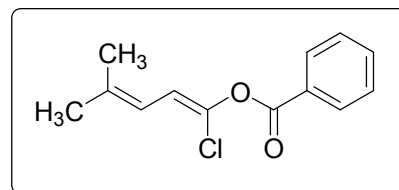

**(1Z,3E)-1-chlorohepta-1,3-dienyl acetate (18)**

Colorless liquid

Yield: 90%

$^1\text{H-NMR}$  (300 MHz,  $\text{CDCl}_3$ )  $\delta$  0.92 (t,  $J = 7.1$  Hz, 3H), 1.47-1.40 (quintet, 2H), 2.09 (q,  $J = 7.0$  Hz, 2H), 2.19 (s, 3H), 5.82 (dt,  $J_1 = 13.8$  Hz,  $J_2 = 6.9$  Hz, 1H), 5.98 (d,  $J = 10.8$  Hz, 1H), 6.18-6.13 (m, 1H).

$^{13}\text{C-NMR}$  (75 MHz,  $\text{CDCl}_3$ )  $\delta$  14.06, 20.87, 20.93, 22.58, 35.46, 118.92, 123.78, 133.31, 138.81, 168.29.

FTIR (neat)  $\nu_{\text{max}}$  2960, 2930, 2874, 1786, 1699, 1658, 1370, 1182, 1074, 968, 879, 668  $\text{cm}^{-1}$

GCMS (CI): 189.1 (M+1)

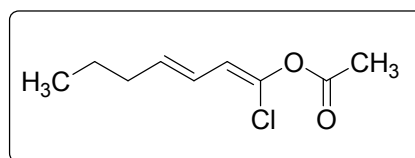

**(1Z,3E)-1-chlorohepta-1,3-dienyl 4-methoxybenzoate (20)**

Colorless liquid

Yield: 83%

$^1\text{H-NMR}$  (300 MHz,  $\text{CDCl}_3$ )  $\delta$  0.94 (t,  $J = 7.3$  Hz), 1.49-1.42 (m, 2H), 2.14 (q,  $J = 7.4$  Hz), 3.8 (s, 3H), 5.85 (dq,  $J_1 = 14.9$  Hz,  $J_2 = 6.6$  Hz, 1H), 6.1 (d,  $J = 10.6$  Hz, 1H), 6.27-6.13 (m, 1H), 6.95 (d,  $J = 9.0$  Hz, 2H), 8.04 (d,  $J = 9.0$  Hz, 2H)

$^{13}\text{C-NMR}$  (75 MHz,  $\text{CDCl}_3$ )  $\delta$  14.07, 22.64, 35.52, 55.93, 114.36, 119.09, 120.85, 124.00, 132.92, 133.83, 138.59, 163.88, 164.72.

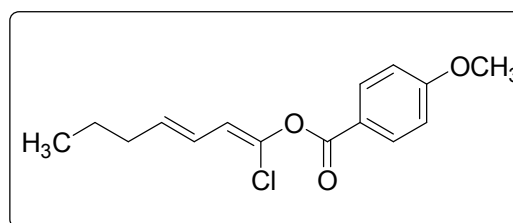

FTIR (neat)  $\nu_{\max}$  2960, 2931, 2873, 1786, 1699, 1658, 1370, 1183, 1074, 968, 880  $\text{cm}^{-1}$

GCMS (CI): 281.2 (M+1)

**(1E,3E)-1-chloro-4,8-dimethylnona-1,3,7-trienyl acetate (22a)**

Colorless liquid

Yield: 12%

$^1\text{H-NMR}$  (300 MHz,  $\text{CDCl}_3$ )  $\delta$  1.56 (s, 3H), 1.62 (s, 3H), 1.70 (s, 3H), 1.85 (s, 3H), 2.12 (s, 3H), 2.24 (s, 3H), 5.08 (m, 1H), 5.62 (s, 1H), 7.30 (s, 1H).

$^{13}\text{C-NMR}$  (75 MHz,  $\text{CDCl}_3$ )  $\delta$  18.09, 18.57, 20.99, 26.07, 26.75, 40.33, 116.69, 119.33, 123.26, 132.62, 133.26, 144.06, 167.77.

FTIR (neat)  $\nu_{\max}$  2964, 2925, 2854, 1764, 1706, 1619, 1435, 1371, 1207, 1046  $\text{cm}^{-1}$

GCMS (CI): 243.2 (M+1)

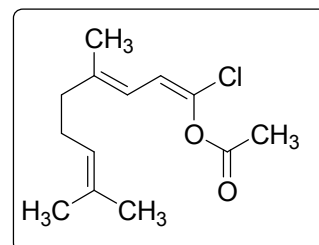

**(1Z,3E)-1-chloro-4,8-dimethylnona-1,3,7-trienyl acetate(22b)**

Colorless liquid

Yield: 64%

$^1\text{H-NMR}$  (300 MHz,  $\text{CDCl}_3$ )  $\delta$  1.62 (s, 3H), 1.69 (s, 3H), 1.74 (d,  $J = 1.3$  Hz, 3H), 2.13 (t,  $J = 2.7$  Hz, 4H), 2.21 (s, 3H), 5.10 (bs, 1H), 5.93 (d,  $J = 10.9$  Hz, 1H), 6.19 (d,  $J = 10.9$  Hz, 1H).

$^{13}\text{C-NMR}$  (75 MHz,  $\text{CDCl}_3$ )  $\delta$  17.77, 18.14, 20.99, 26.10, 26.86, 40.52, 115.41, 118.15, 124.06, 132.44, 133.69, 143.79, 168.58.

FTIR (neat)  $\nu_{\max}$  2971, 2922, 2854, 1785, 1613, 1441, 1369, 1178, 1076, 881, 720, 669  $\text{cm}^{-1}$

GCMS (CI): 243.2 (M+1)

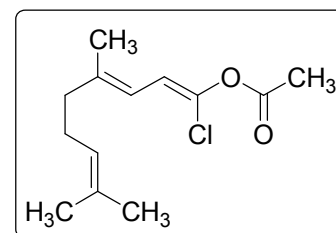

**(1Z,3E)-1-fluoro-4-phenylbuta-1,3-dienyl acetate (24)**

White low melting solid

Yield: 74%

$^1\text{H-NMR}$  (300 MHz,  $\text{CDCl}_3$ )  $\delta$  2.27 (s, 3H), 5.4 (dd,  $J_1 = 25.8$  Hz,  $J_2 = 10.8$  Hz, 1H), 6.55 (d,  $J = 15.8$  Hz, 1H), 6.88 (dd,  $J_1 = 15.9$  Hz,  $J_2 = 10.8$  Hz, 1H), 7.47-7.29 (m, 5H)

$^{13}\text{C-NMR}$  (75 MHz,  $\text{CDCl}_3$ )  $\delta$  20.72 (d,  $J = 21.9$  Hz,  $\text{CH}_3\text{-F}$  coupling), 96.32 (d,  $J = 74.93$  Hz, C-F coupling), 119.39, 126.73, 128.10, 129.074, 132.27, 137.38, 149.17, 153.00, 167.44

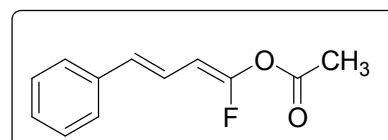

$^{19}\text{F}$ -NMR (75 MHz,  $\text{CDCl}_3$ )  $\delta$  -84.25 (d, 25.9 Hz).

FTIR (neat)  $\nu_{\text{max}}$  3060, 3027, 2925, 1791, 1690, 1369, 1188, 1150, 1131, 1010, 985, 964, 928, 867, 747, 691  $\text{cm}^{-1}$

GCMS (CI): 207.1 ( $\text{M}+1$ )

**(1Z,3E)-1-chloro-4-(furan-2-yl)-3-methylbuta-1,3-dienyl acetate (26)**

White colored low melting solid

Yield: 68%

$^1\text{H}$ -NMR (300 MHz,  $\text{CDCl}_3$ )  $\delta$  3.22 (d,  $J = 9.6$ , 3H), 2.28 (s, 3H), 6.05 (s, 1H), 6.38 (d,  $J = 3.2$  Hz, 1H), 3.43 (bs, 1H), 7.42 (bs, 1H).

$^{13}\text{C}$ -NMR (75 MHz,  $\text{CDCl}_3$ )  $\delta$  17.82, 20.96, 111.23, 111.96, 121.75, 123.12, 128.65, 133.07, 142.52, 153.16, 168.31.

FTIR (neat)  $\nu_{\text{max}}$  2922, 1777, 1629, 1368, 1180, 1068, 1027, 884, 734, 668, 608  $\text{cm}^{-1}$

GCMS (EI): 226.1 ( $\text{M}^+$ )

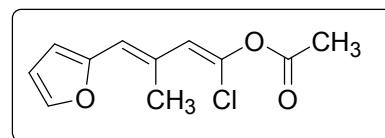

## 2. Data of original compounds

### <sup>1</sup>H-NMR spectrum of dienol ester (2)

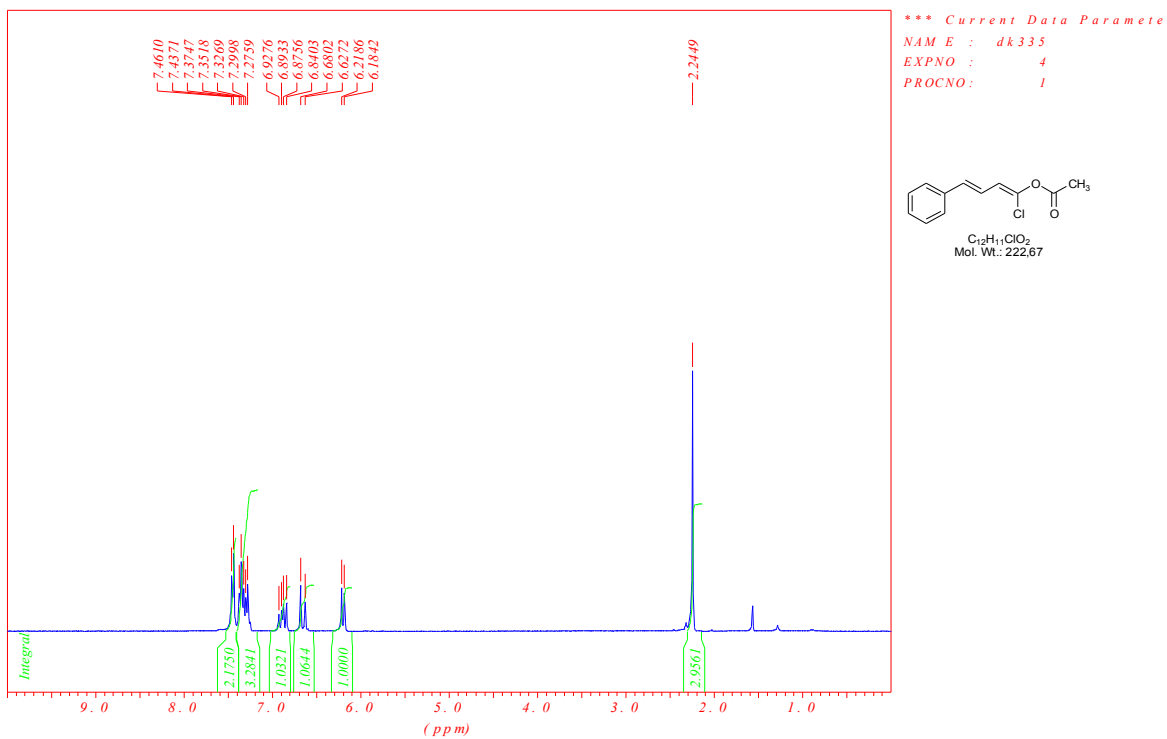

### <sup>13</sup>C-NMR spectrum of dienol ester (2)



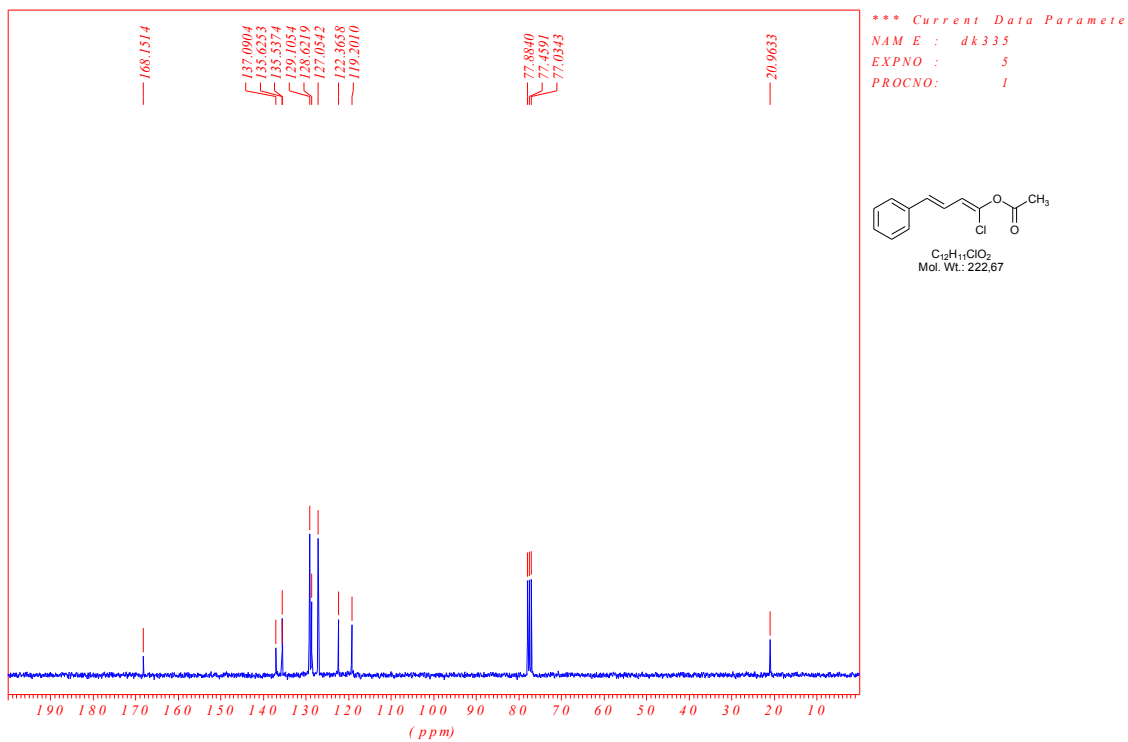

**<sup>1</sup>H-NMR spectrum of dienol ester (4)**

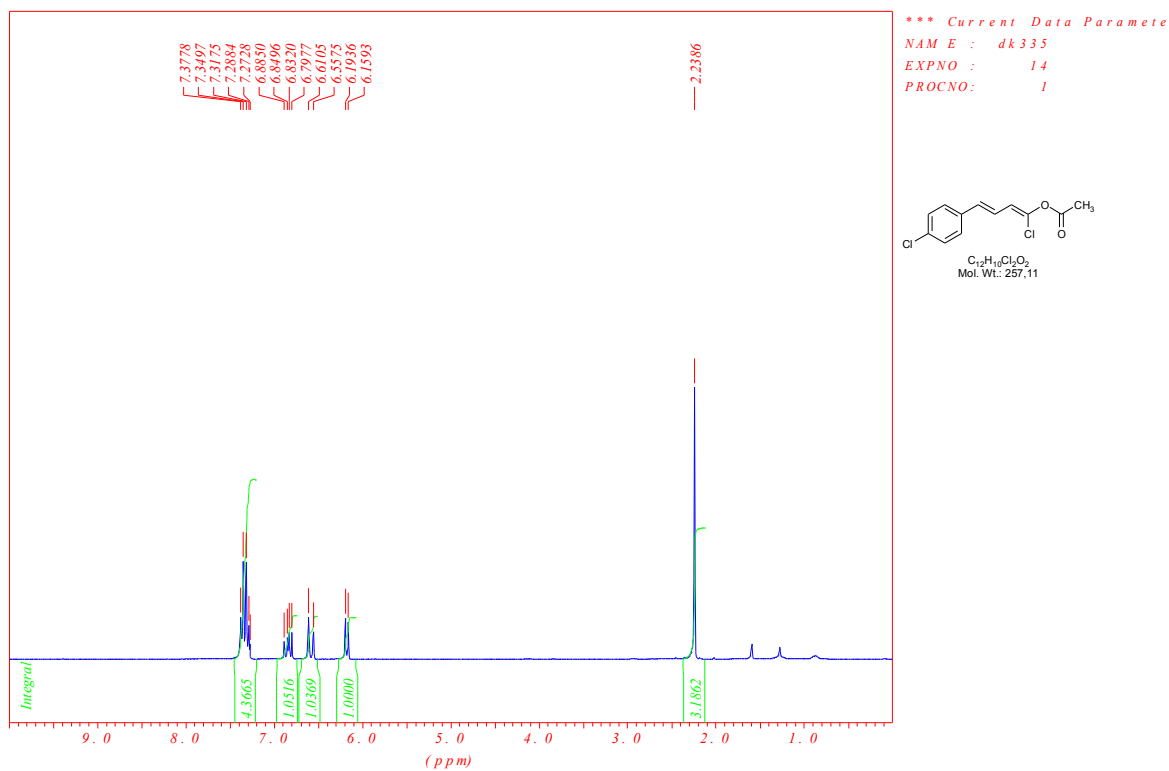

**<sup>13</sup>C-NMR spectrum of dienol ester (4)**

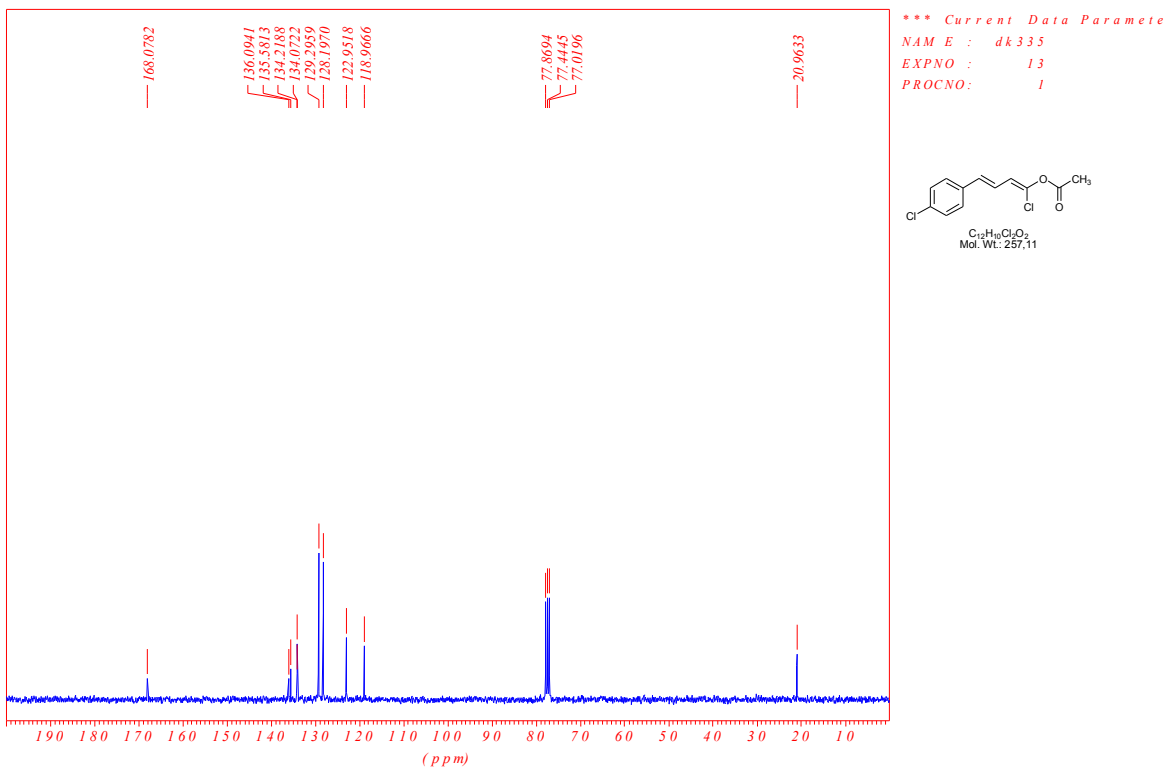

**<sup>1</sup>H-NMR spectrum of crude reaction mixture of dienol ester (6)**

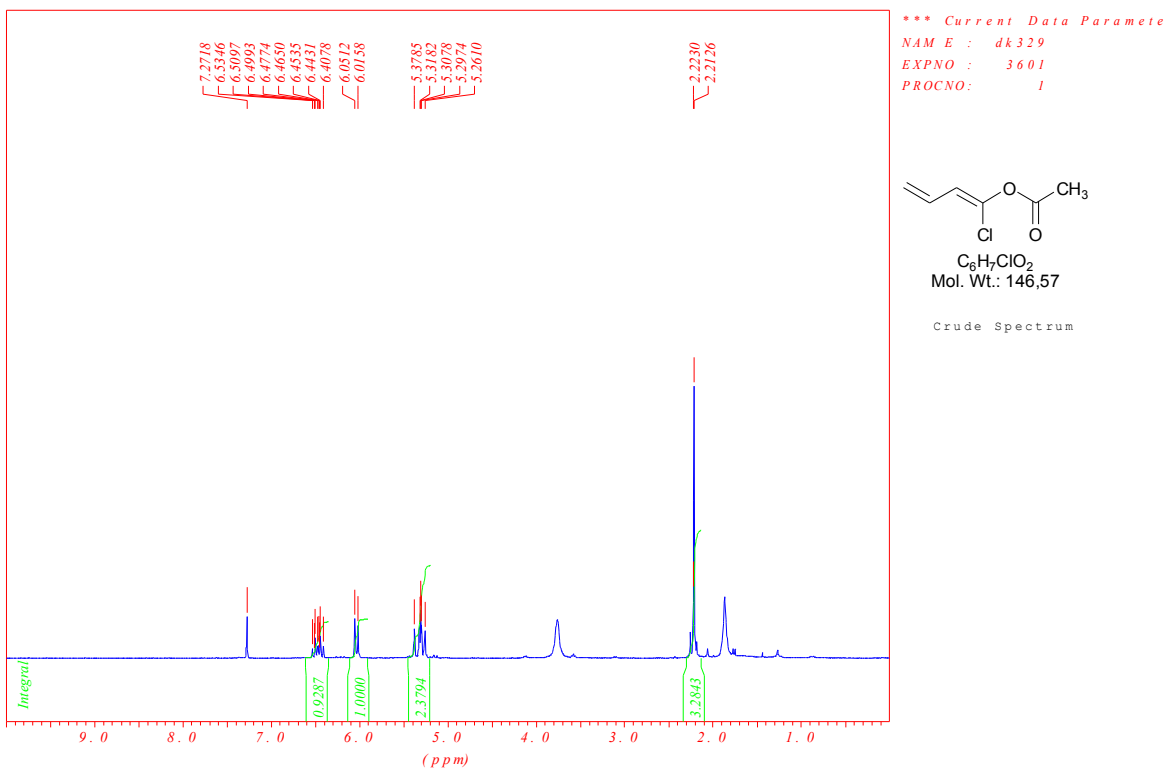

### <sup>13</sup>C-NMR spectrum of crude reaction mixture of dienol ester (6)

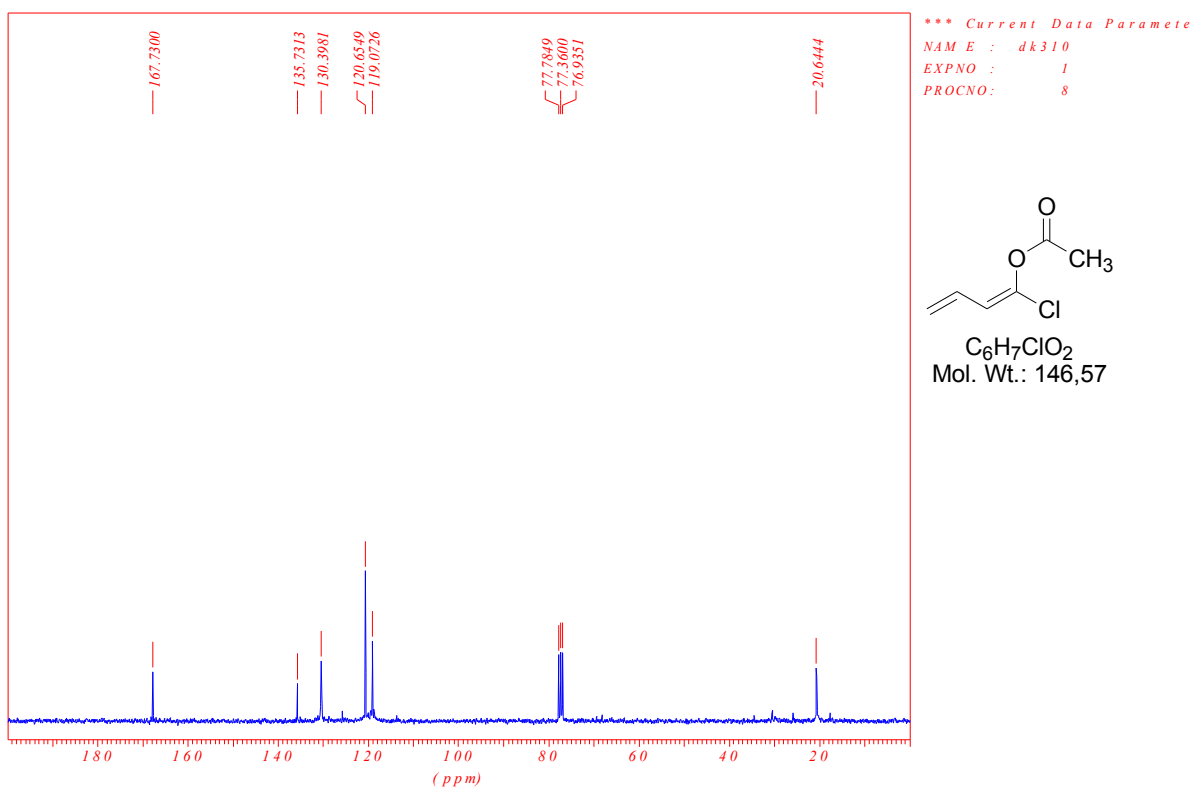

### <sup>1</sup>H-NMR spectrum of dienol ester (8)

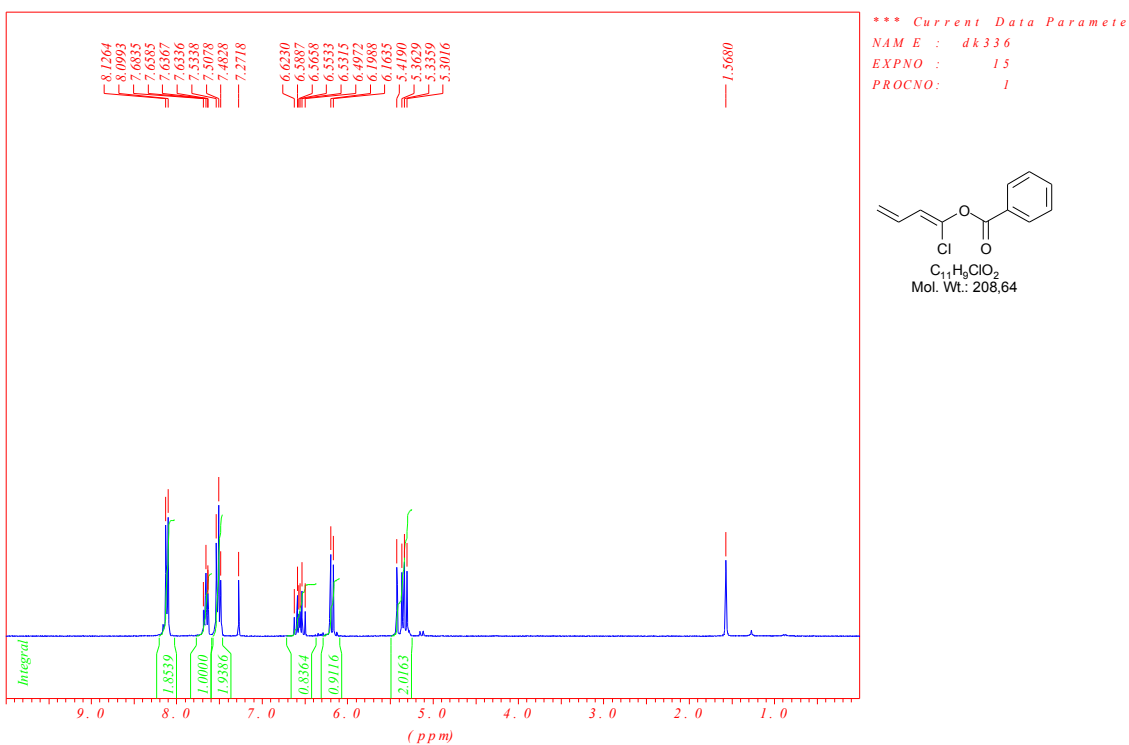

### <sup>13</sup>C-NMR spectrum of dienol ester (8)

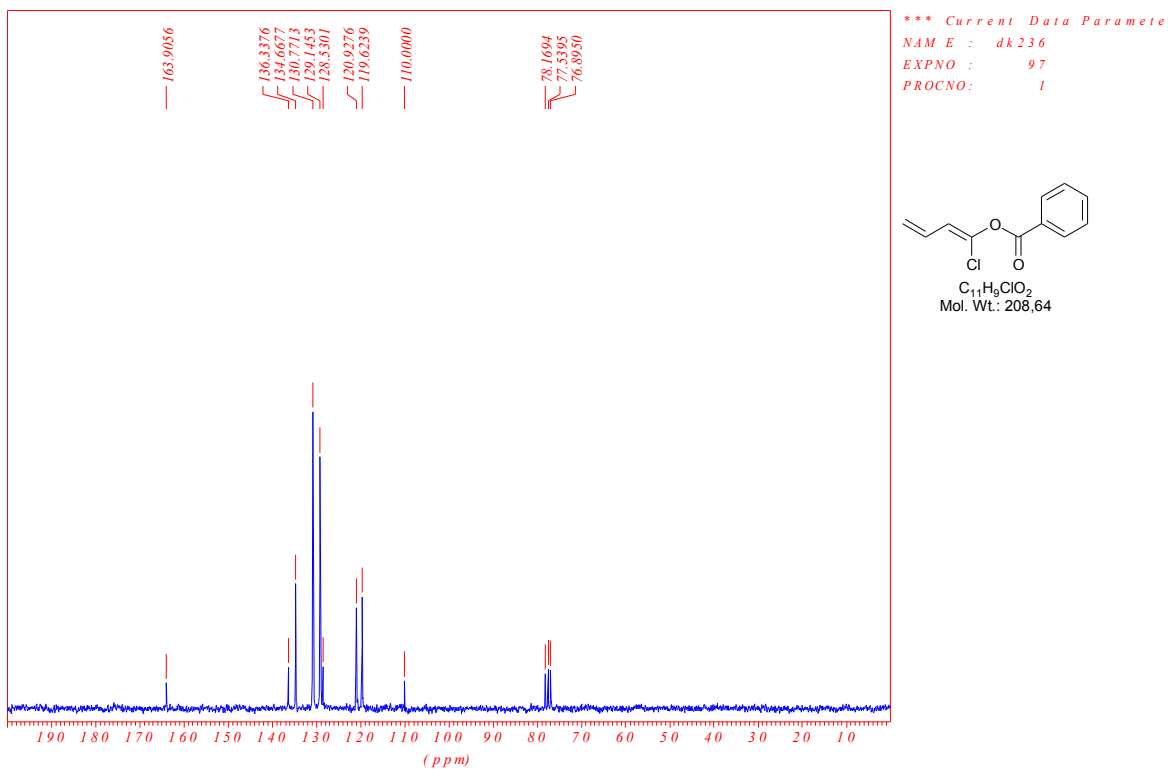

### <sup>1</sup>H-NMR spectrum of dienol ester (10)

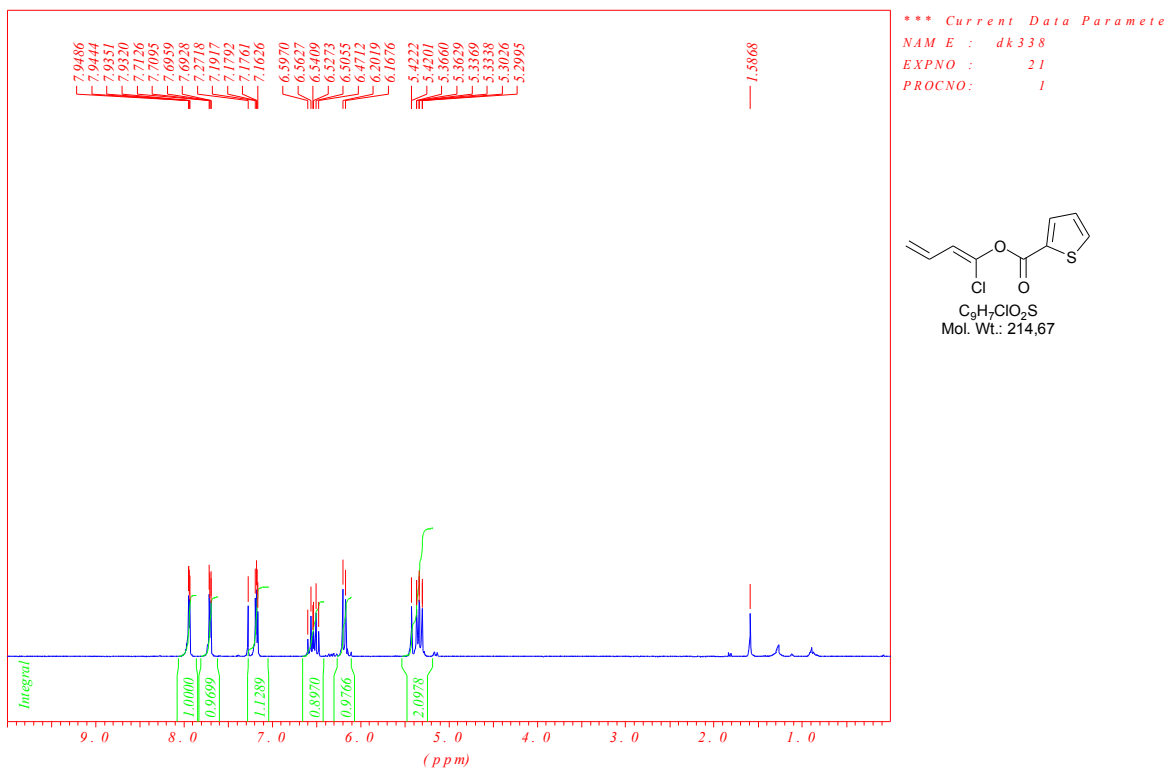

### <sup>13</sup>C-NMR spectrum of dienol ester (10)

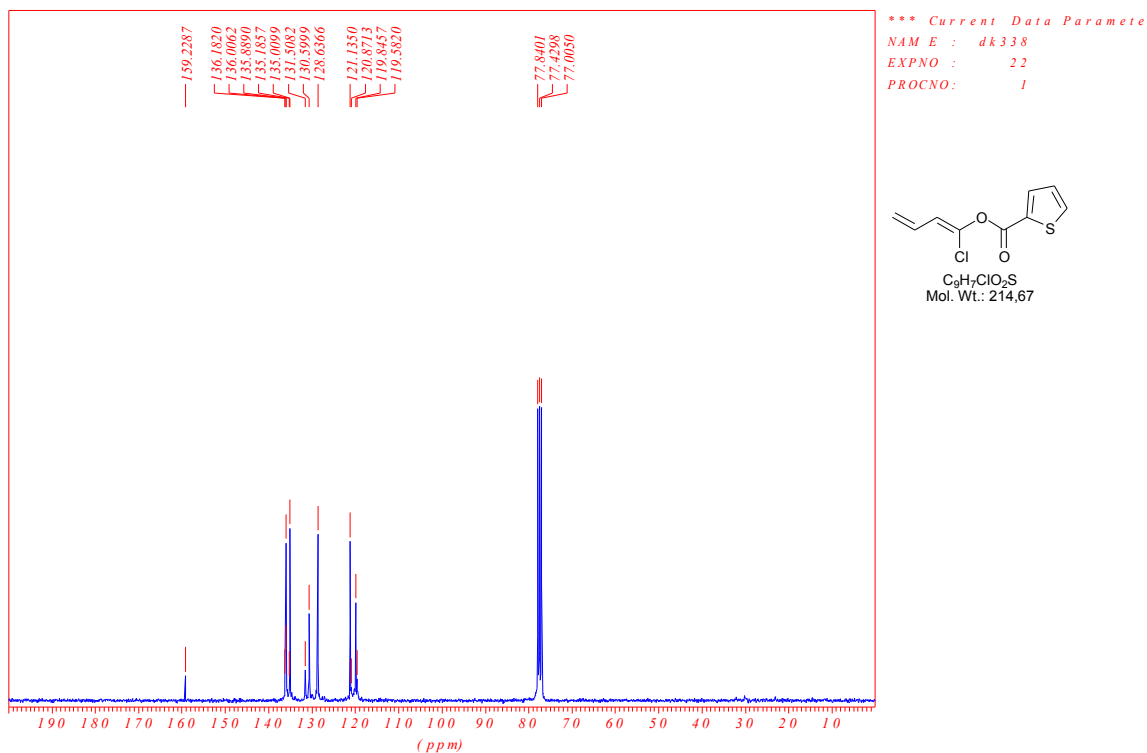

### <sup>1</sup>H-NMR spectrum of dienol ester (12)

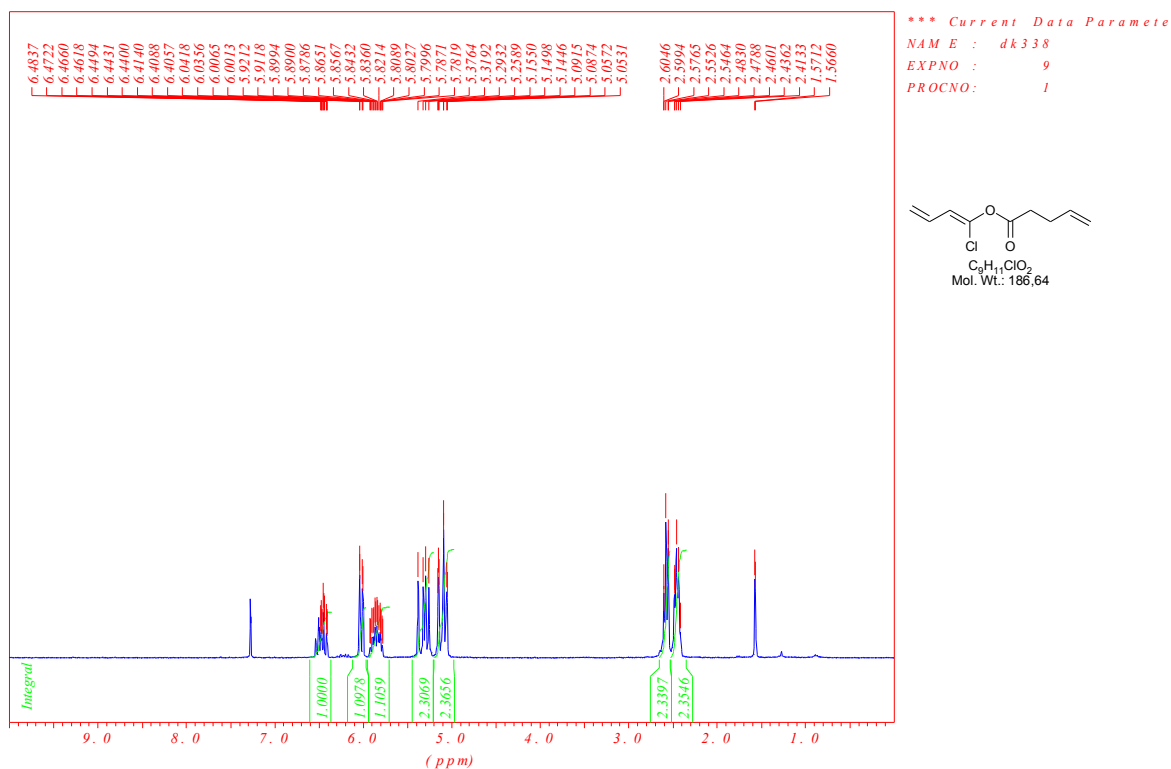

### <sup>13</sup>C-NMR spectrum of dienol ester (12)

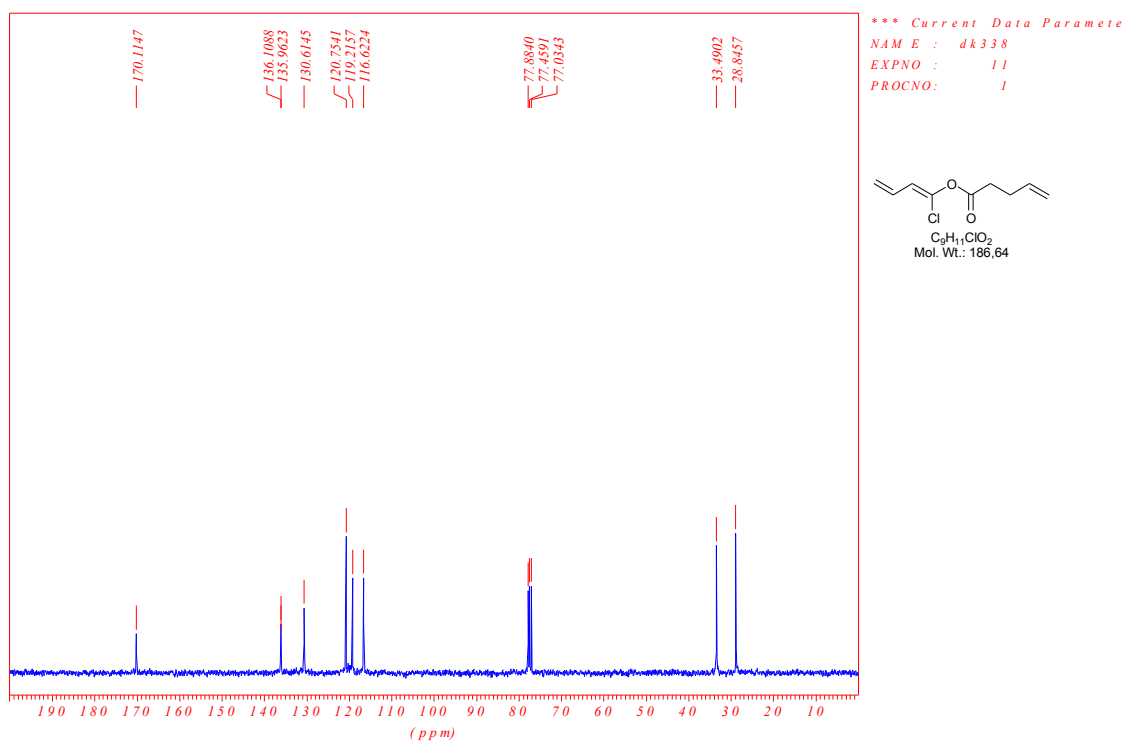

### <sup>1</sup>H-NMR spectrum of crude reaction mixture of dienol ester (14)

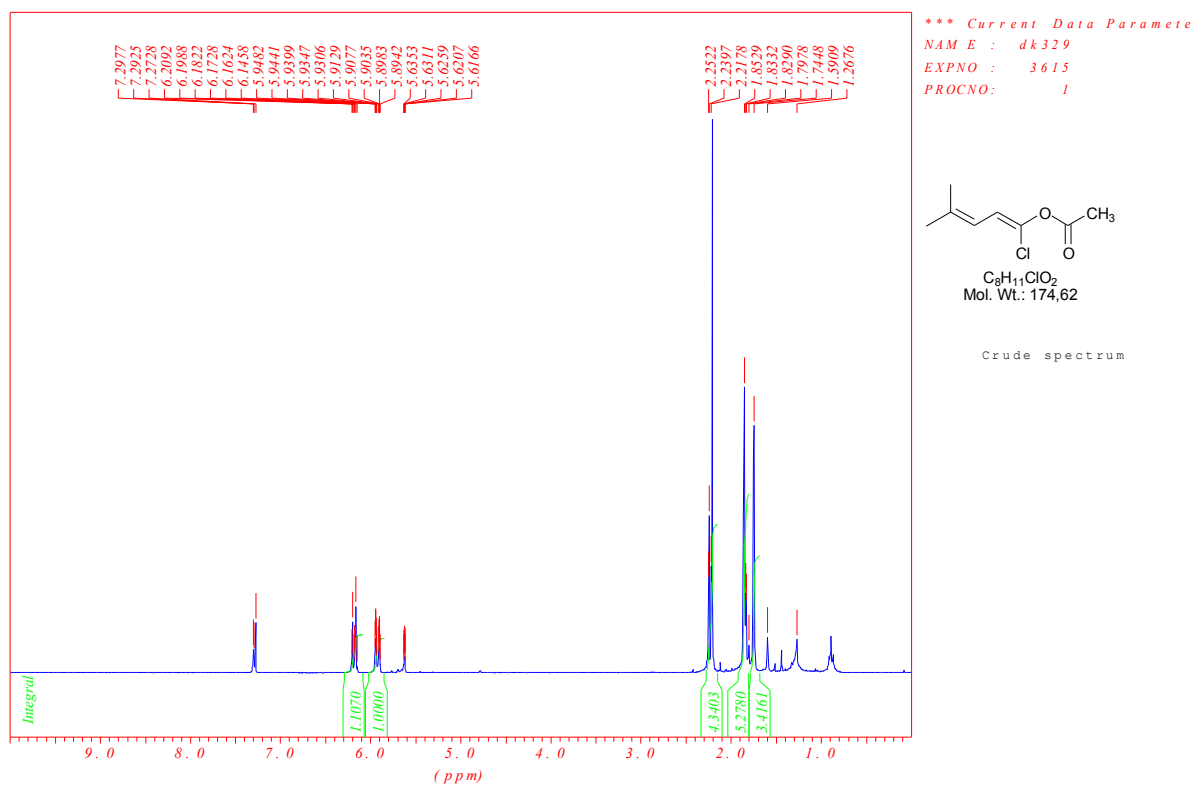

### <sup>13</sup>C-NMR spectrum of crude reaction mixture of dienol ester (14)

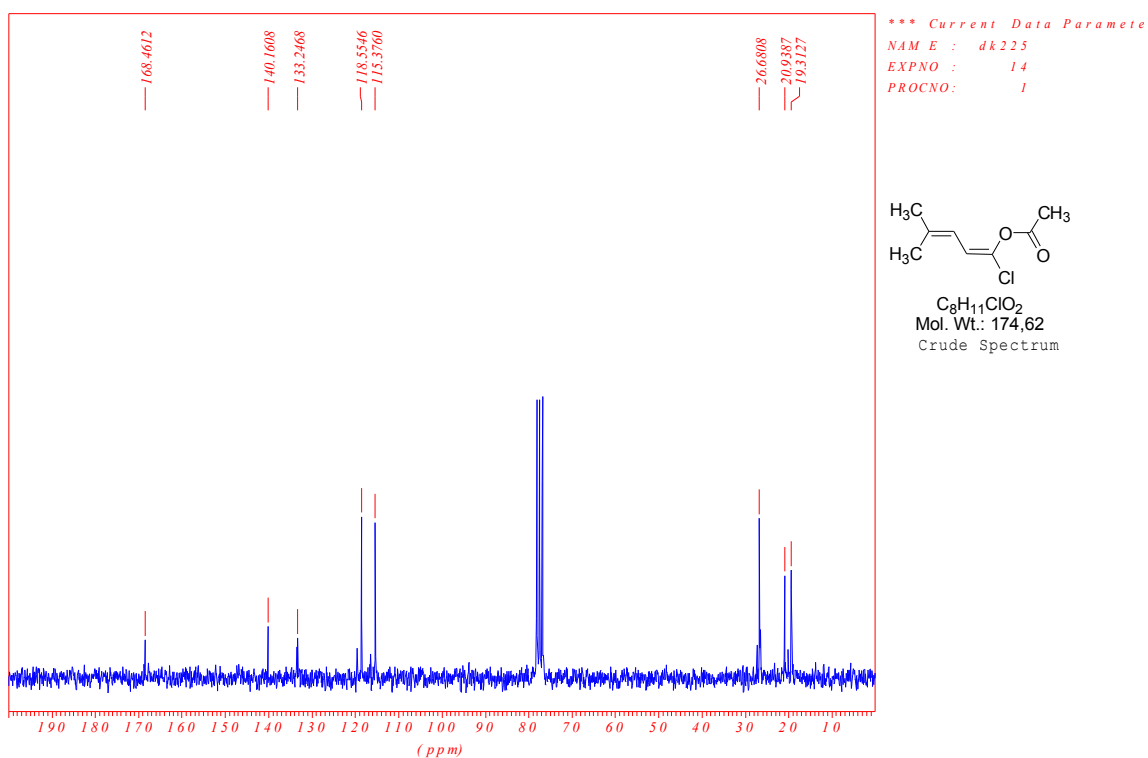

### <sup>1</sup>H-NMR spectrum of dienol ester (16)

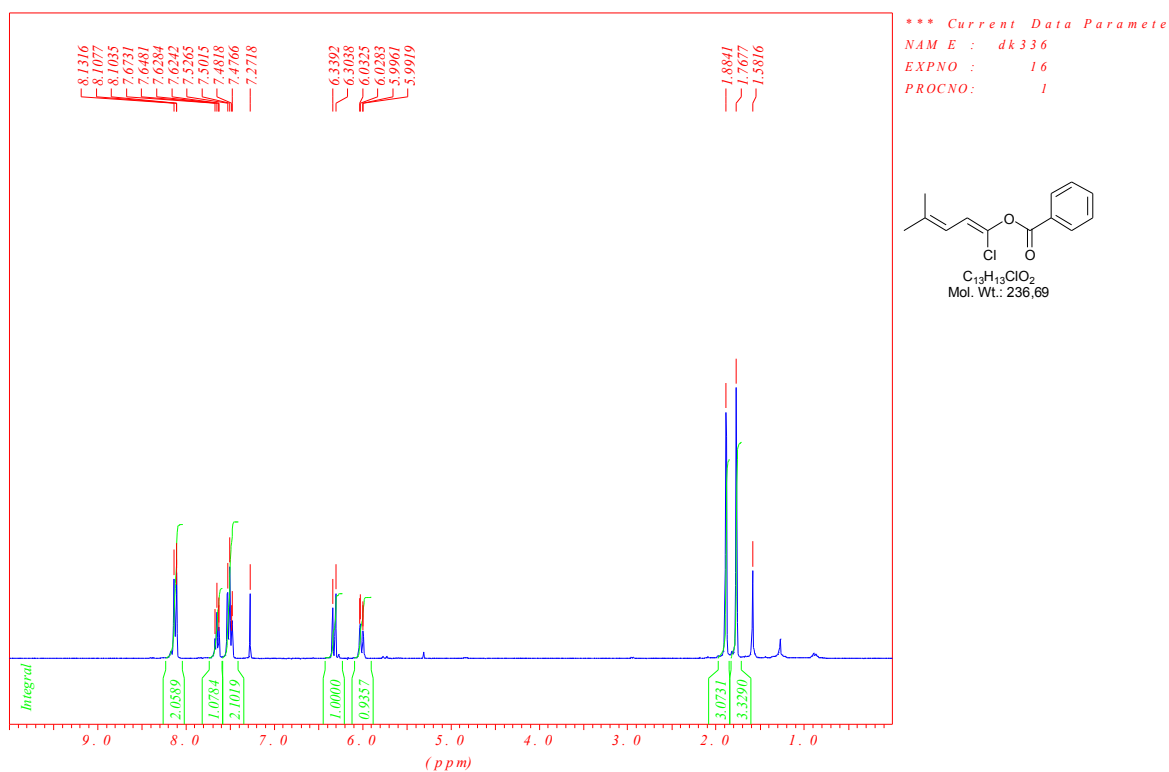

### <sup>13</sup>C-NMR spectrum of dienol ester (16)

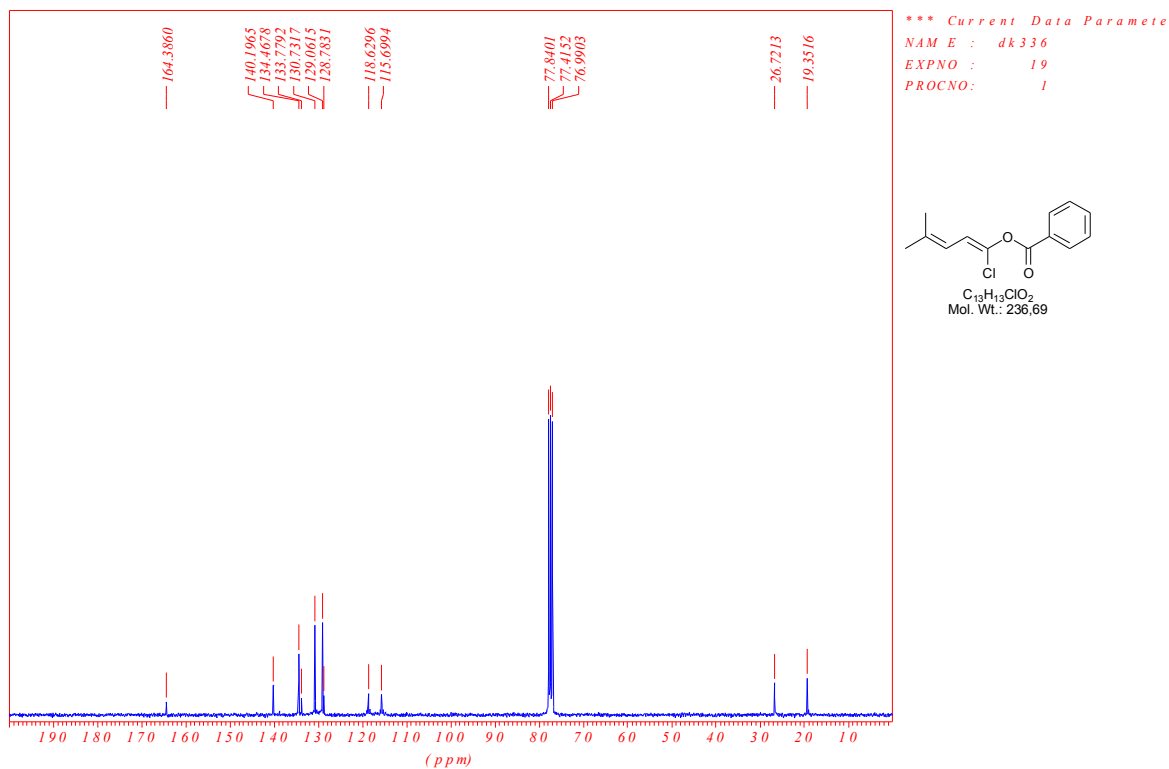

### <sup>1</sup>H-NMR spectrum of dienol ester (18)

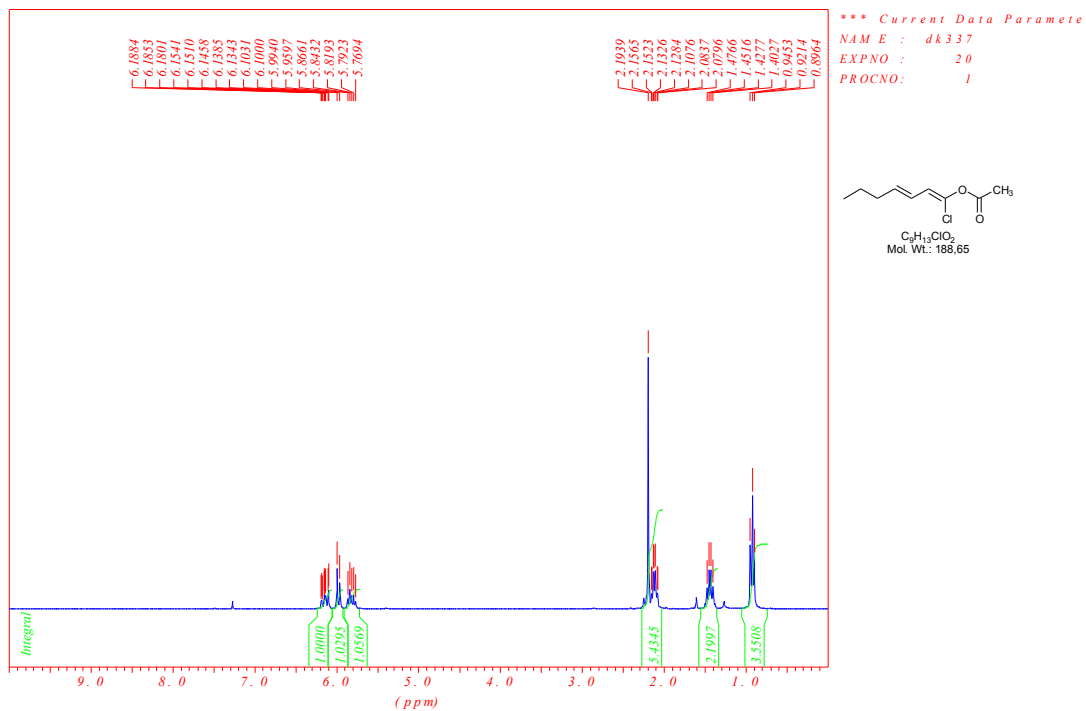



### <sup>13</sup>C-NMR spectrum of dienol ester (18)

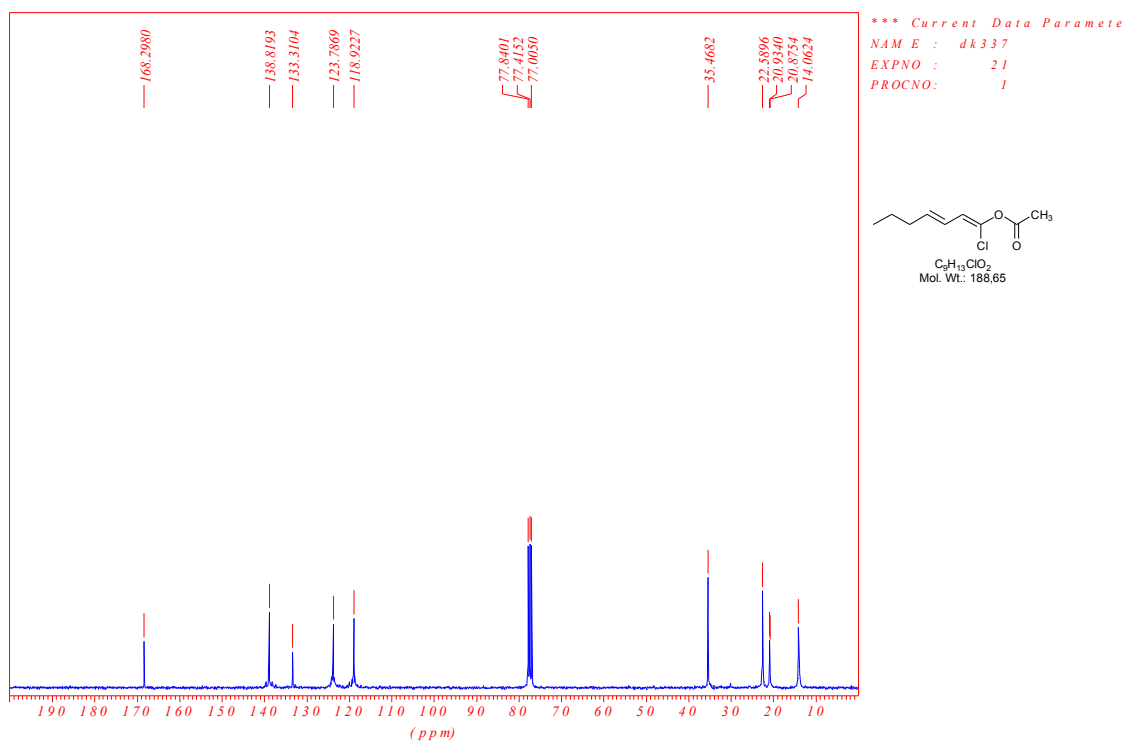

### <sup>1</sup>H-NMR spectrum of dienol ester (20)

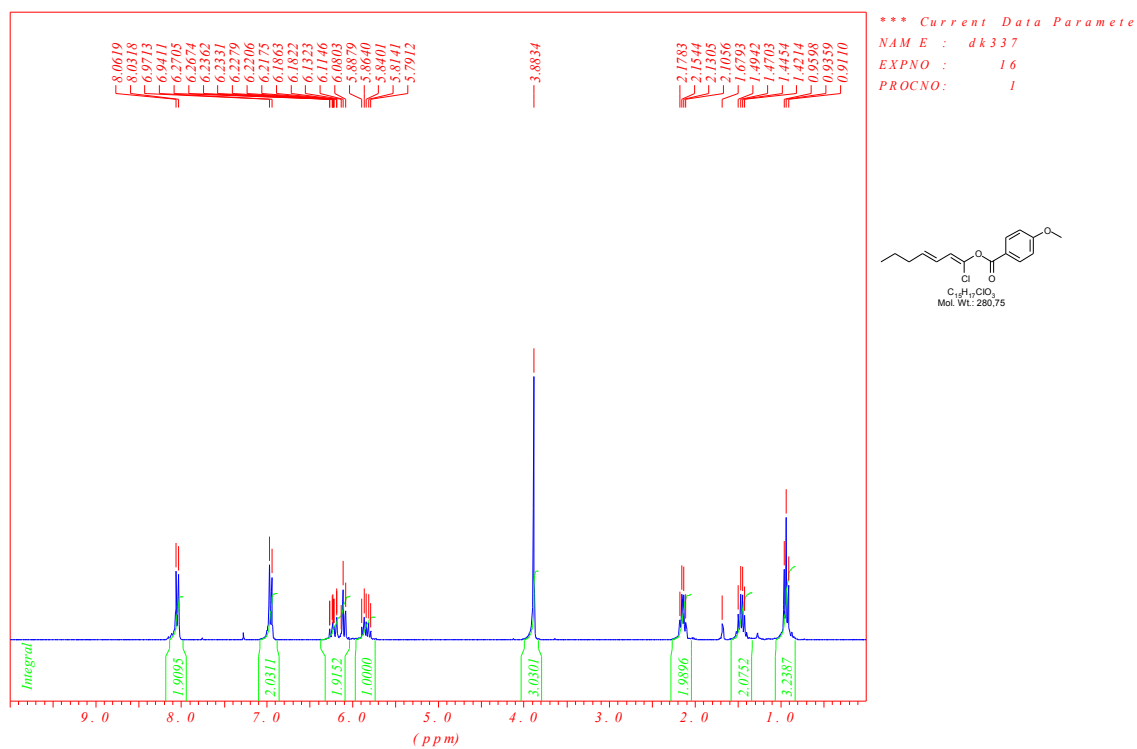

### <sup>13</sup>C-NMR spectrum of dienol ester (20)

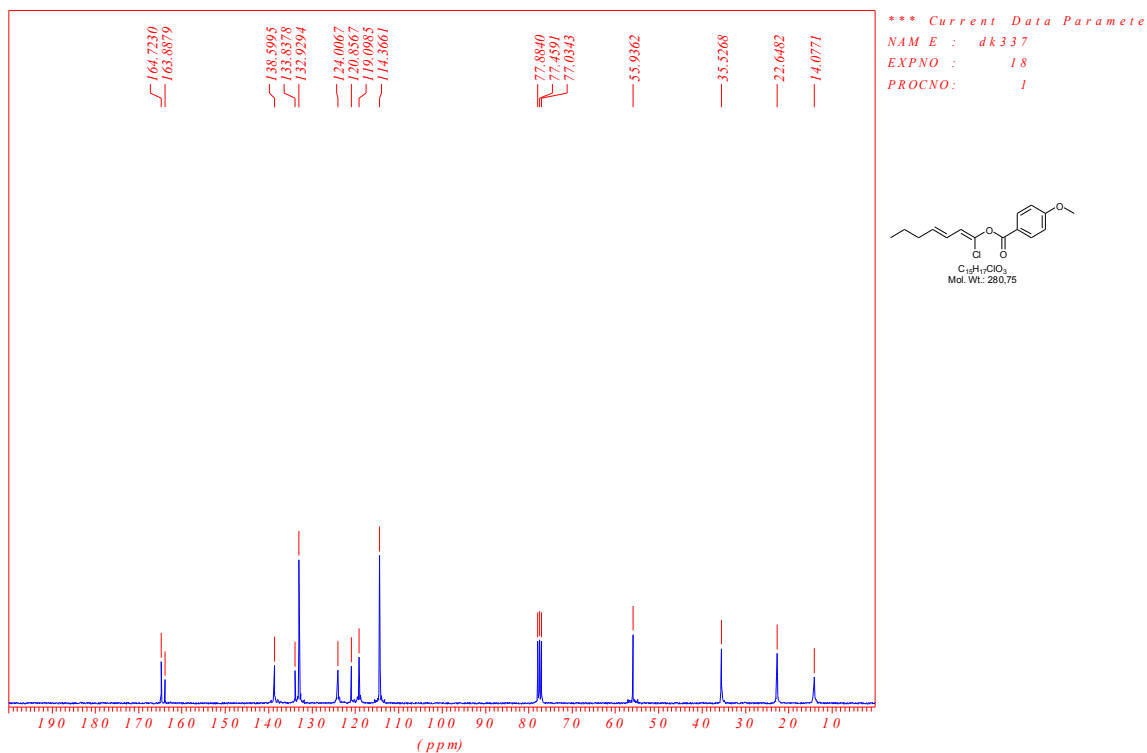

### <sup>1</sup>H-NMR spectrum of (E,E)-1-chloro-1,3-dienol ester (22a, MINOR ISOMER)

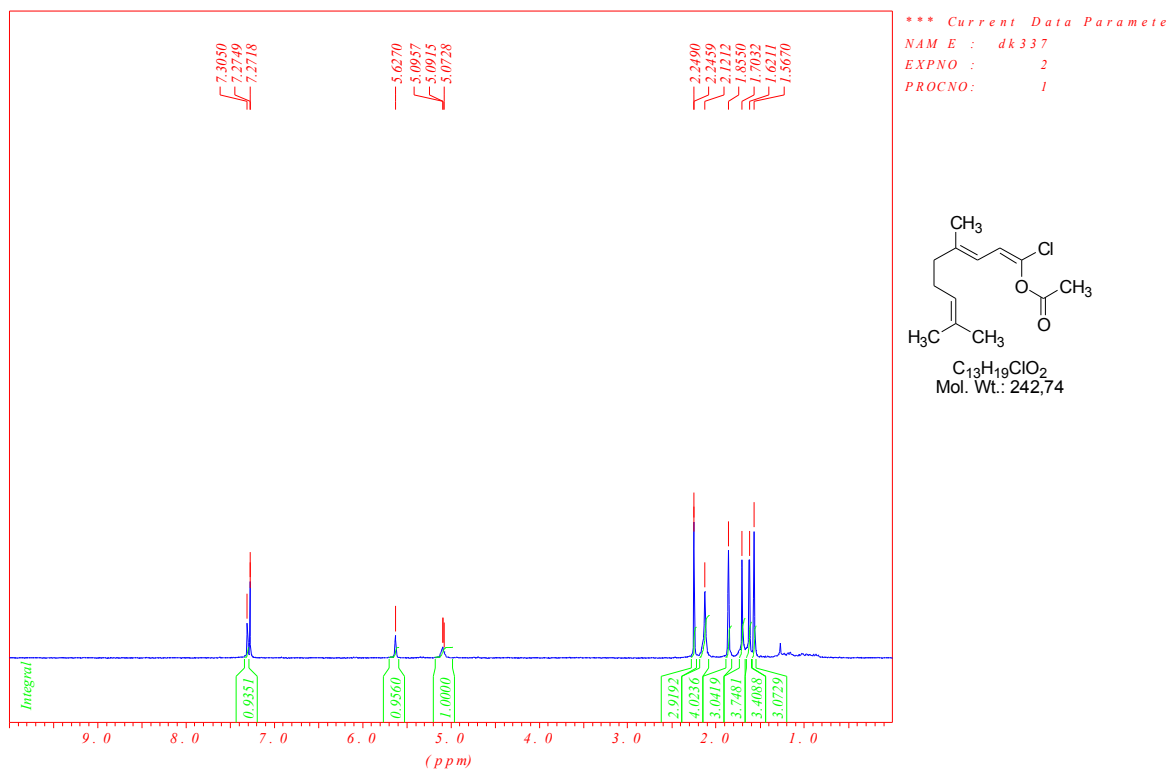

### <sup>13</sup>C-NMR spectrum of (*E,E*)-1-chloro-1,3-dienol ester (22a, MINOR ISOMER)

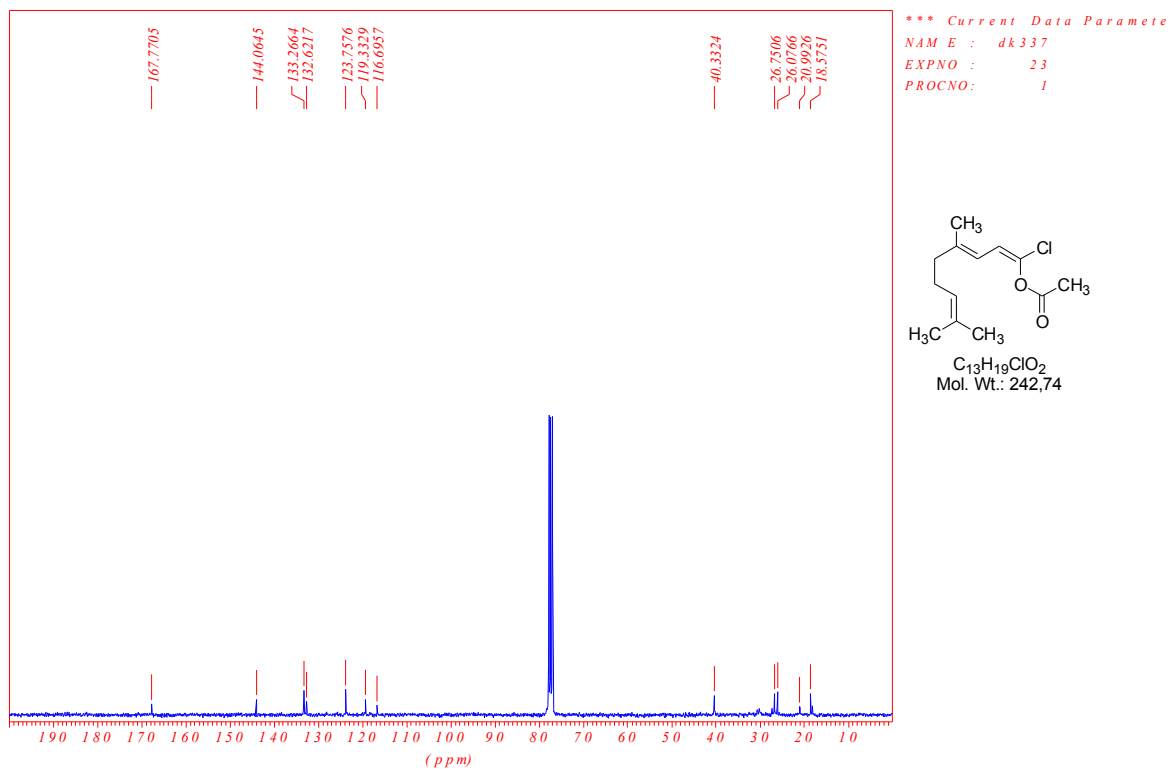

### <sup>1</sup>H-NMR spectrum of dienol ester (22b, MAJOR ISOMER)

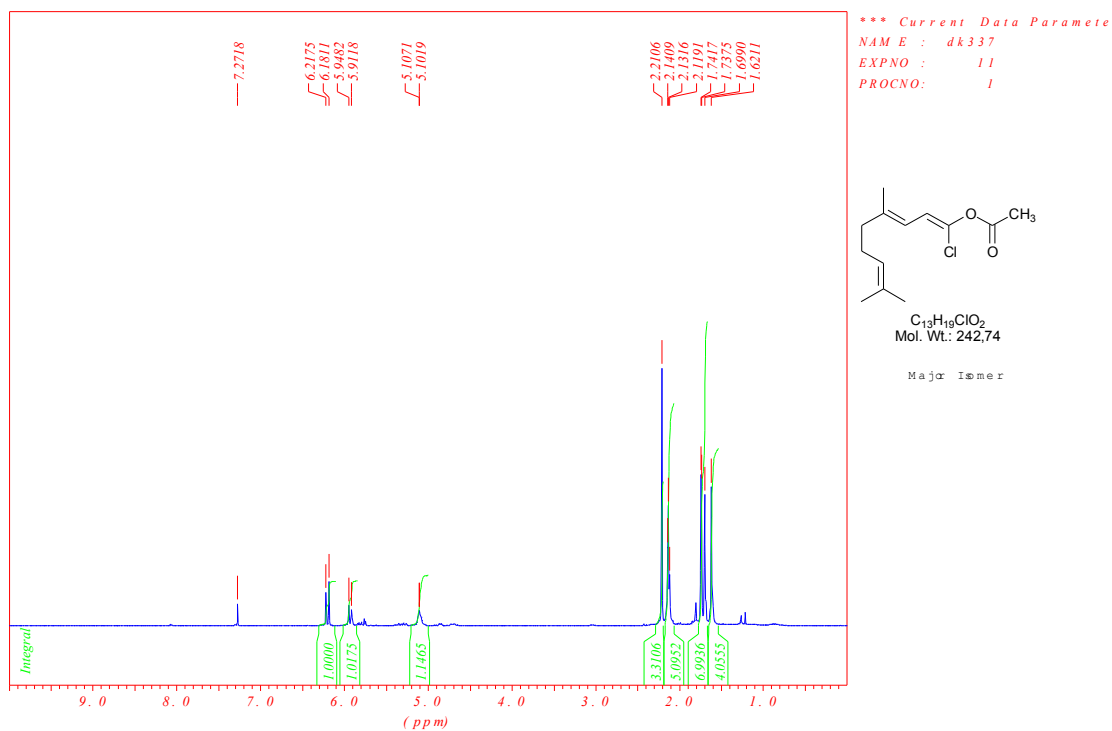

### <sup>13</sup>C-NMR spectrum of dienol ester (22b, MAJOR ISOMER)

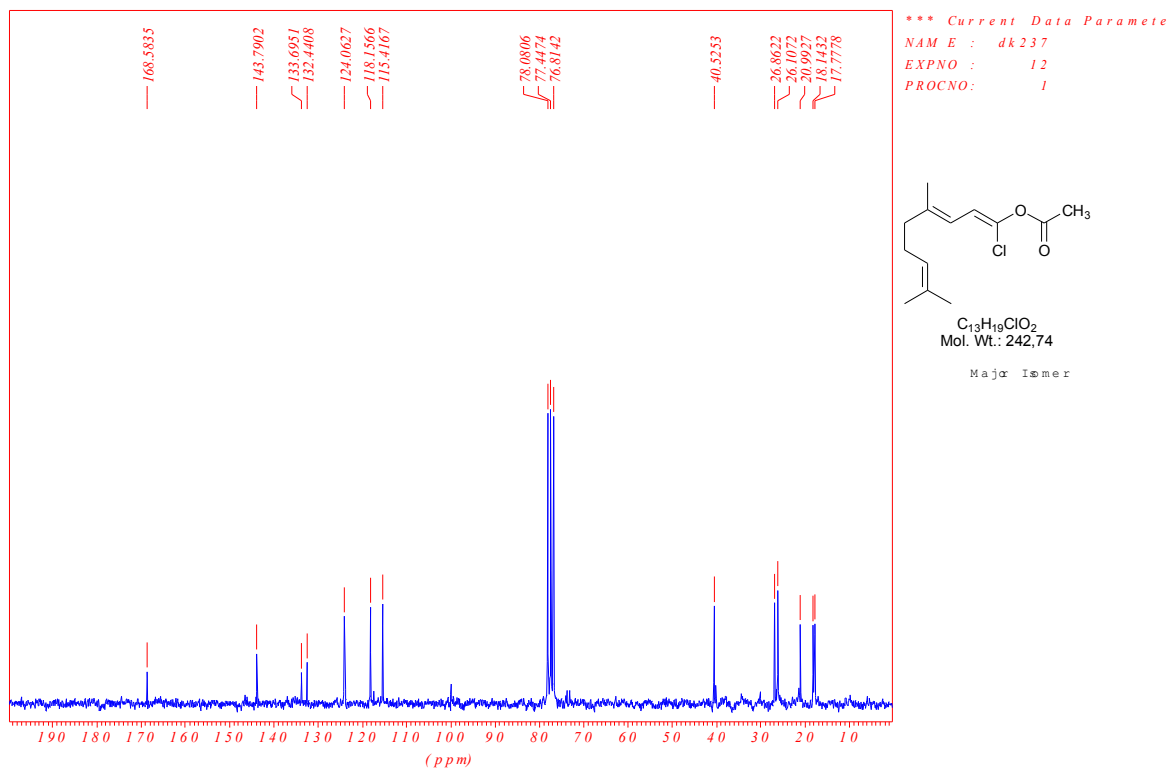

### <sup>1</sup>H-NMR spectrum of dienol ester (24)

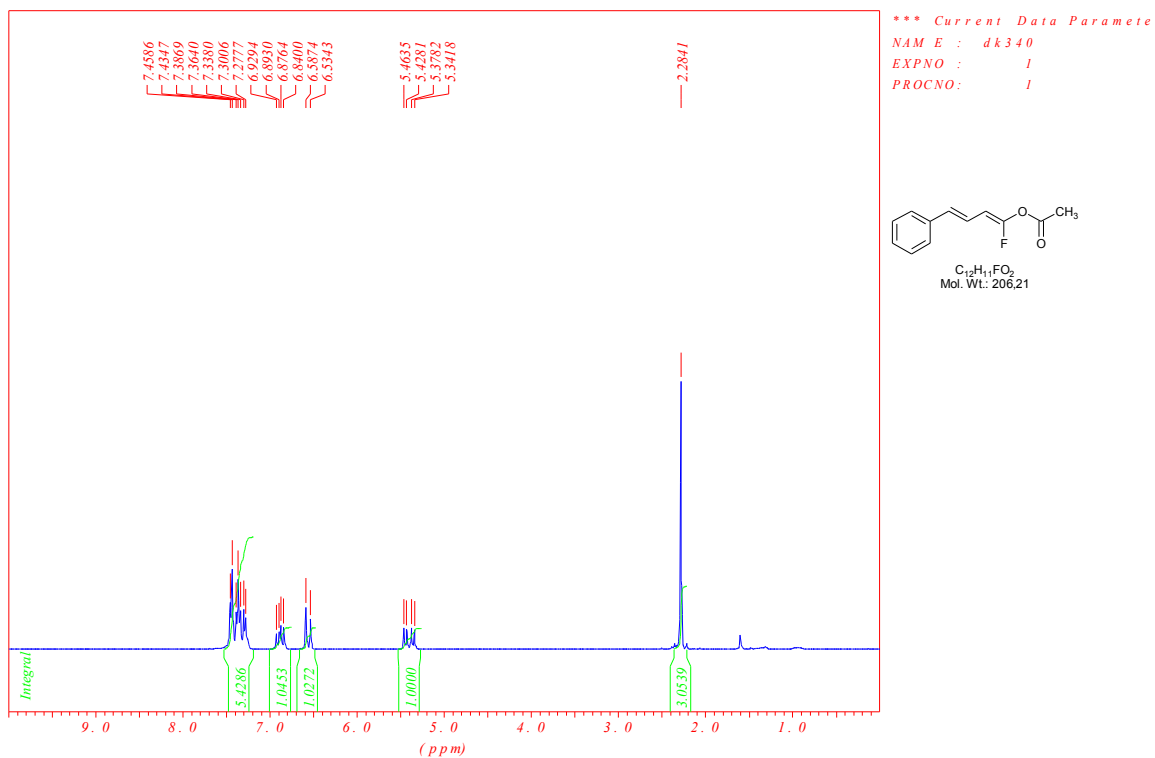

### <sup>13</sup>C-NMR spectrum of dienol ester (24)

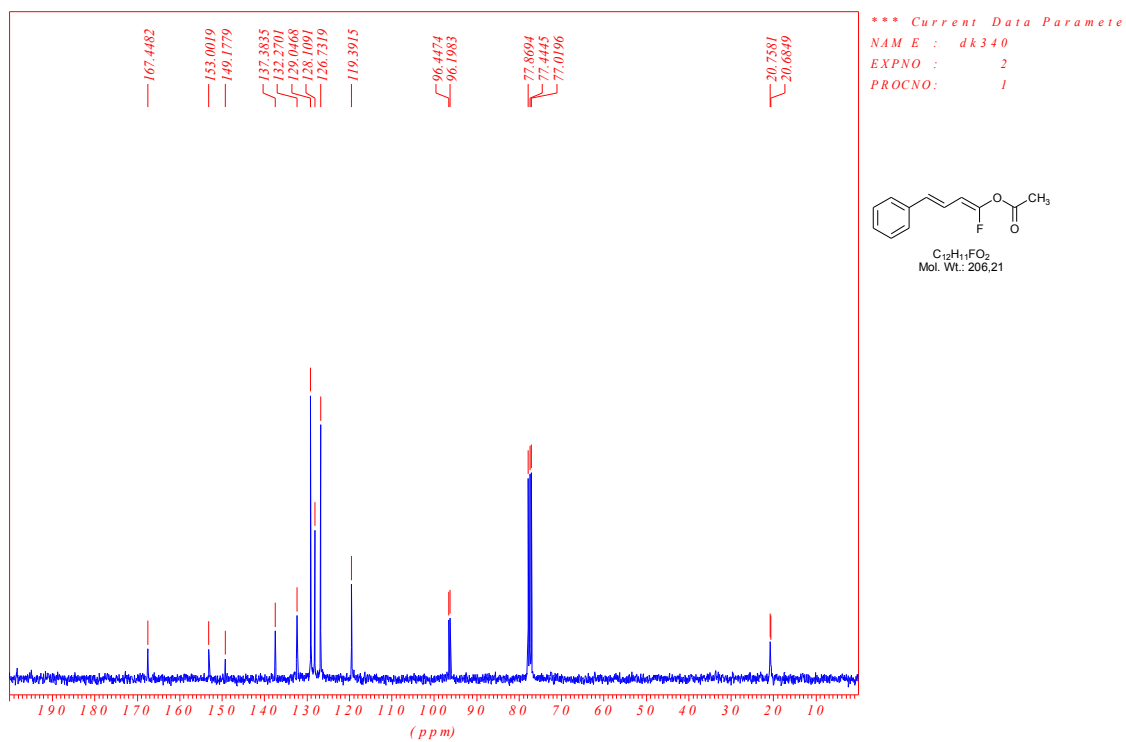

### <sup>1</sup>H-NMR spectrum of dienol ester (26)

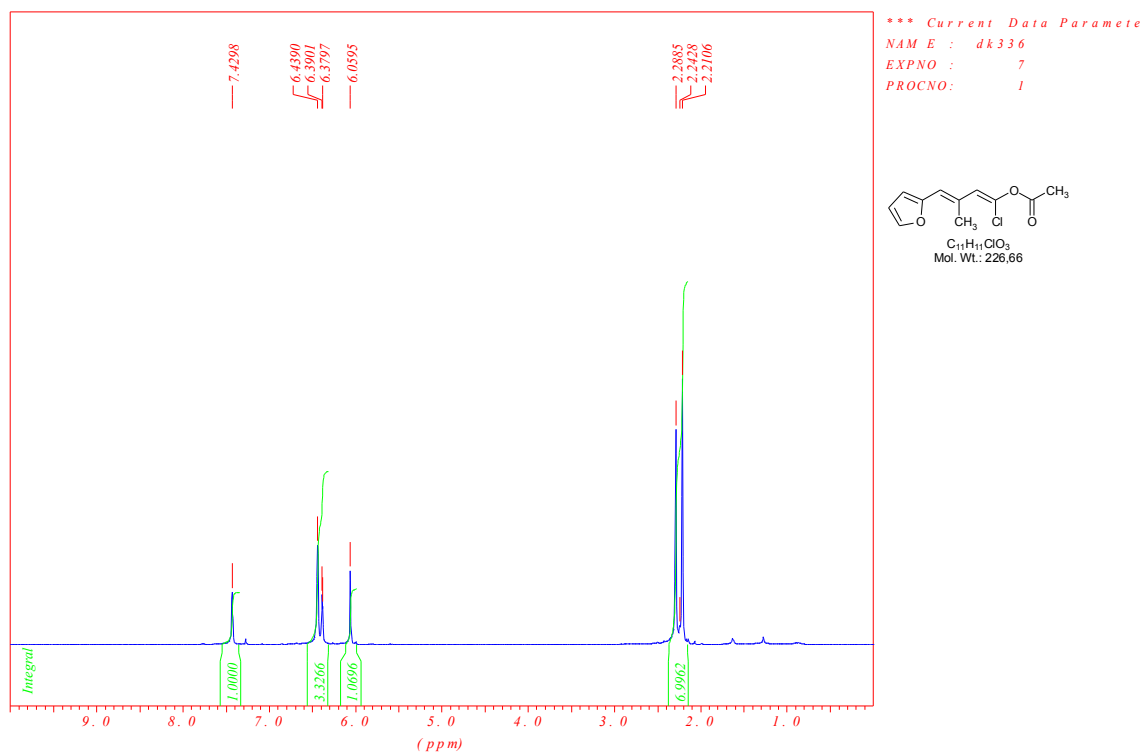

# <sup>13</sup>C-NMR spectrum of dienol ester (26)

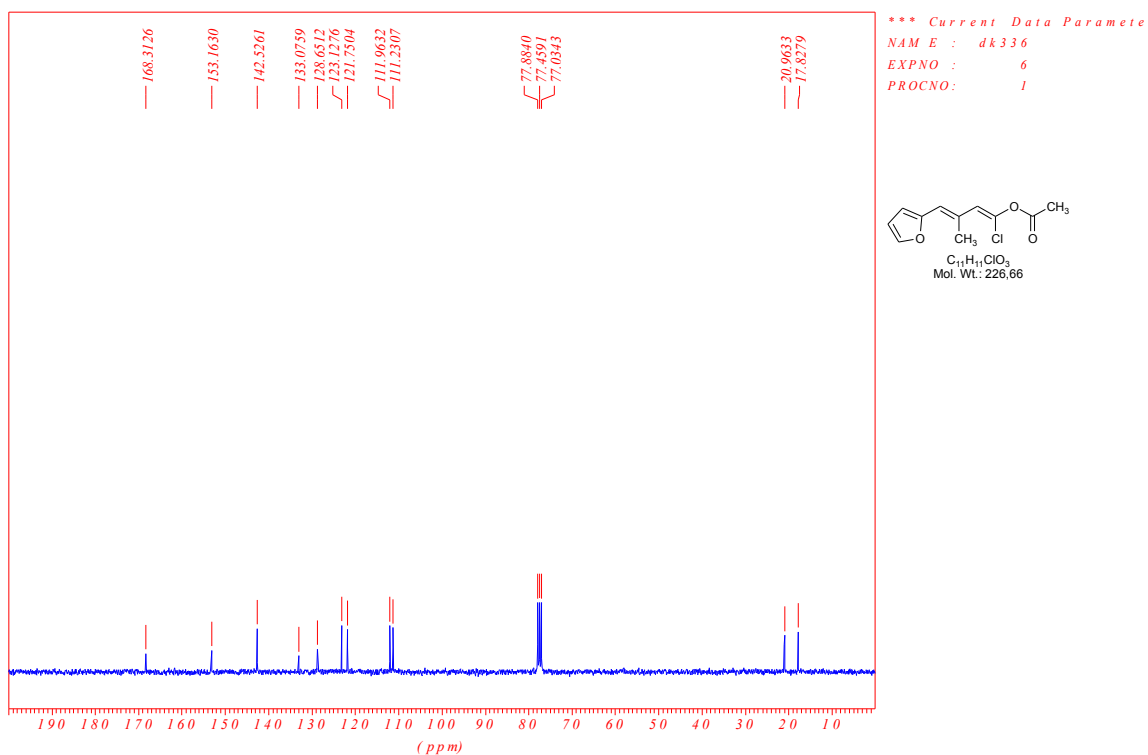

### 3. X-ray structure plot of 4 generated by Ortep-32 software

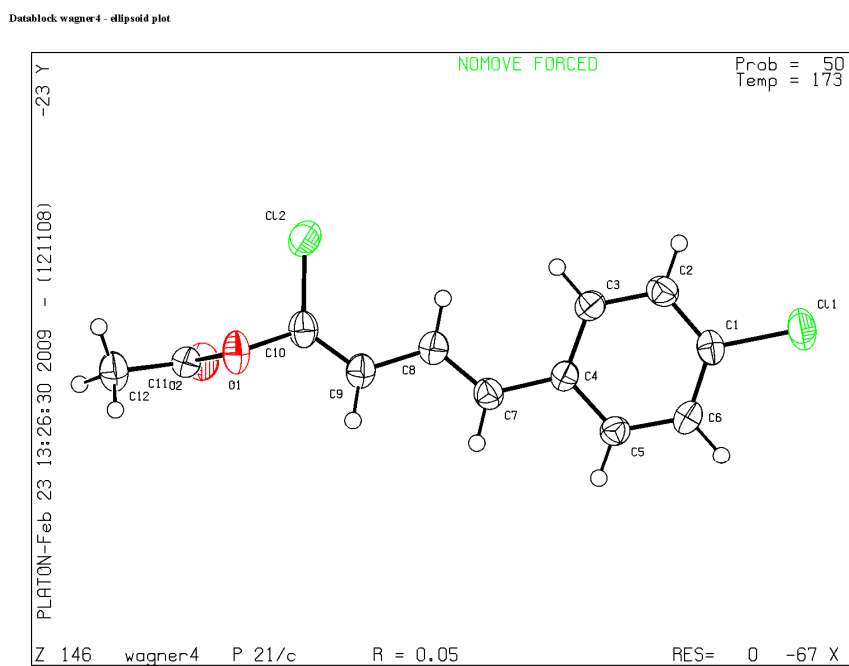

# X-ray structure plot of **26** generated by Ortep-32 software

Datablock wagner2 - ellipsoid plot

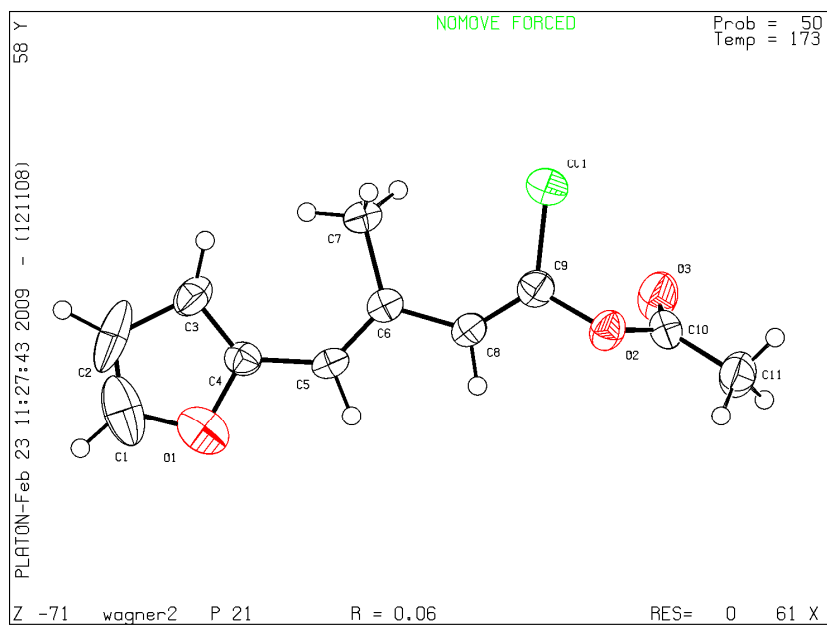

Supplement: b903244b.pdf [file b903244b.pdf]
